# Supplementary material for: High performance near-infrared photodetectors based on ultrathin SnS nanobelts grown via physical vapor deposition
Source: Royal Society of Chemistry journal article supplement (doi:10.1039/c5tc04410c), 2016-01-01
Supplement: c5tc04410c1.pdf [file c5tc04410c1.pdf]

Supporting information

**High performance near-infrared photodetectors based on ultrathin SnS nanobelts grown via physical vapor deposition**

Xing Zhou, Lin Gan, Qi Zhang, Xing Xiong, Huiqiao Li, Zhiqiang Zhong, Junbo Han, and Tianyou Zhai\*

State Key Laboratory of Material Processing and Die & Mould Technology, School of Materials Science and Engineering, Wuhan National High Magnetic Field Center, Huazhong University of Science and Technology, Wuhan 430074, P. R. China.

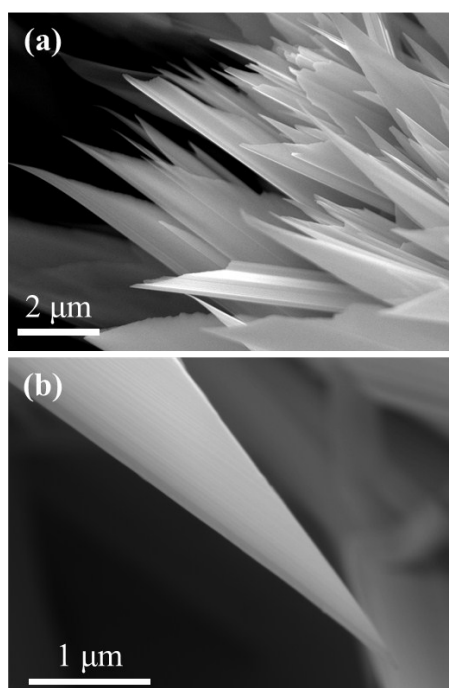

Fig. S1 (a) Typical SEM image of large-scale SnS nanobelts. (b) The enlarged view of a single SnS nanobelt showing the uniform morphology.
